# Supplementary material for: Evaluation of Thyroid Function in Patients Hospitalized for Acute Heart Failure
Source: Int J Endocrinol. 2021 Mar 31;2021:6616681. doi: 10.1155/2021/6616681 (PMC8026290; doi:10.1155/2021/6616681)
Supplement: Supplementary Materials — Table S1. The values shown are linear regression coefficients (β) and 95% confidence intervals, estimated by uni- and multivariate linear regressions, with TSH or FT4 as the independent variable and heart rate, systolic BP, diastolic BP, BNP, LV ejection fraction, and PASP as dependent variables. Table S2. The values shown are linear regression coefficients (β) and 95% confidence intervals, estimated by uni- and multivariate linear regressions, with TSH or FT4 as the independent variable and inhospital mortality, hospital readmission, and all-cause and cardiovascular mortality within 30 days of discharge as dependent variables. [file 6616681.f1.zip]

Archive with 2 entries (2 files):
- Strobe Statement.doc
- Supplementary Material.docx
